# Supplementary material for: Moving pictures of the human microbiome
Source: Springer Nature journal article supplement (doi:10.1186/gb-2011-12-5-r50), 2011-05-30

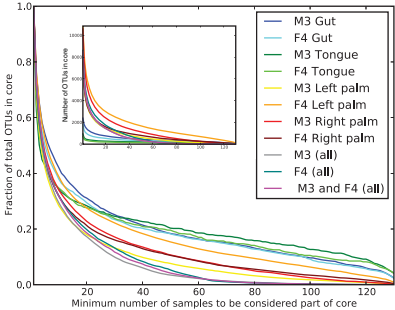

Supplement: 13059_2011_2575_MOESM19_ESM.pdf [file 13059_2011_2575_MOESM19_ESM.pdf]
